# Supplementary material for: Suppression ofPropionibacterium acnes-Induced Dermatitis by a Traditional Japanese Medicine, Jumihaidokuto, Modifying Macrophage Functions
Source: Hindawi journal article supplement (doi:10.1155/2015/439258), 2015-01-01
Supplement: f1 [file 439258.f1.pdf]

## **Supplemental Materials**

**Supplementary Fig. S1. Chemical structures of jumihaidokuto-related compounds evaluated in this study**

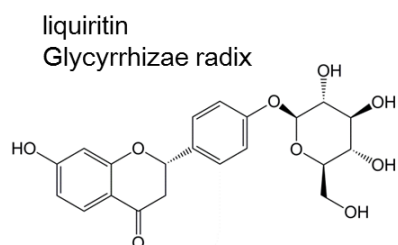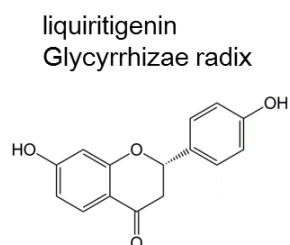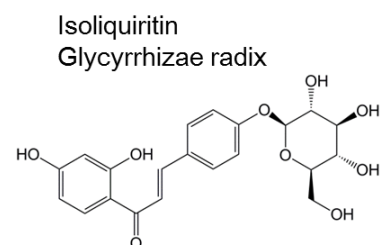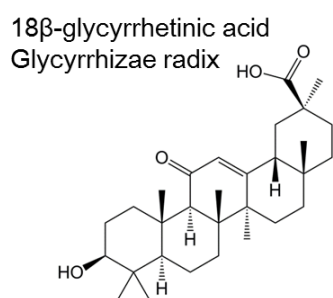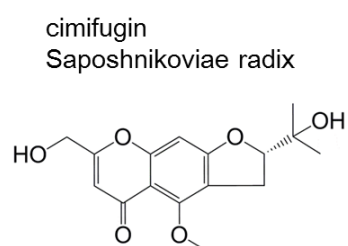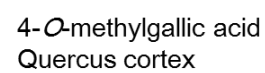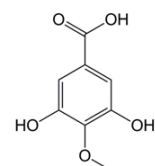

**Supplementary Fig.S1.**
